# Supplementary material
Source: Springer Nature journal article supplement (https://www.springermedizin.de/resource/supplementary/12936_2007_439_MOESM1_ESM.pdf/9547452)
Supplement: MOESM1 [file 9547452]

Total publications identified  
by search strategy  
n = 1069

Not primarily related to diagnosis and treatment  
of fever/malaria symptoms at or near the home  
n = 943

Editorial or opinion piece on HMM/HBMF  
n = 4

Documented existing care-seeking and  
home fever diagnosis/treatment practices  
n = 69

Discussed logistics or other issues related to  
community-based health program  
n = 24

Addressed economic aspects of  
home fever/malaria management  
n = 2

Assessed only community perceptions or  
acceptability of HMM strategy  
n = 5

Assessed only impact on treatment-  
seeking or correctness of treatment  
n = 13

Was not conducted in Africa  
n = 1

Included in the review  
n = 8  
(Reporting on 6  
separate studies)
